# Supplementary material for: Upconversion Nanoparticles Encapsulated with Molecularly Imprinted Amphiphilic Copolymer as a Fluorescent Probe for Specific Biorecognition
Source: Polymers (Basel). 2021 Oct 13;13(20):3522. doi: 10.3390/polym13203522 (PMC8539580; doi:10.3390/polym13203522)
Supplement: Supplementary file 1 [file polymers-13-03522-s001.zip › polymers-1408224-supplementary.pdf]

# Upconversion nanoparticles encapsulated with molecularly imprinted amphiphilic copolymer as a fluorescent probe for specific biorecognition

Hsiu-Wen Chien\*, Chien-Hsin Yang, Yan-Tai Shih, Tzong-Liu Wang\*

<sup>1</sup>Department of Chemical and Materials Engineering, National Kaohsiung University  
of Science and Technology, Kaohsiung 807, Taiwan

<sup>2</sup>Department of Chemical and Materials Engineering, National University of Kaohsiung,  
Kaohsiung 811, Taiwan

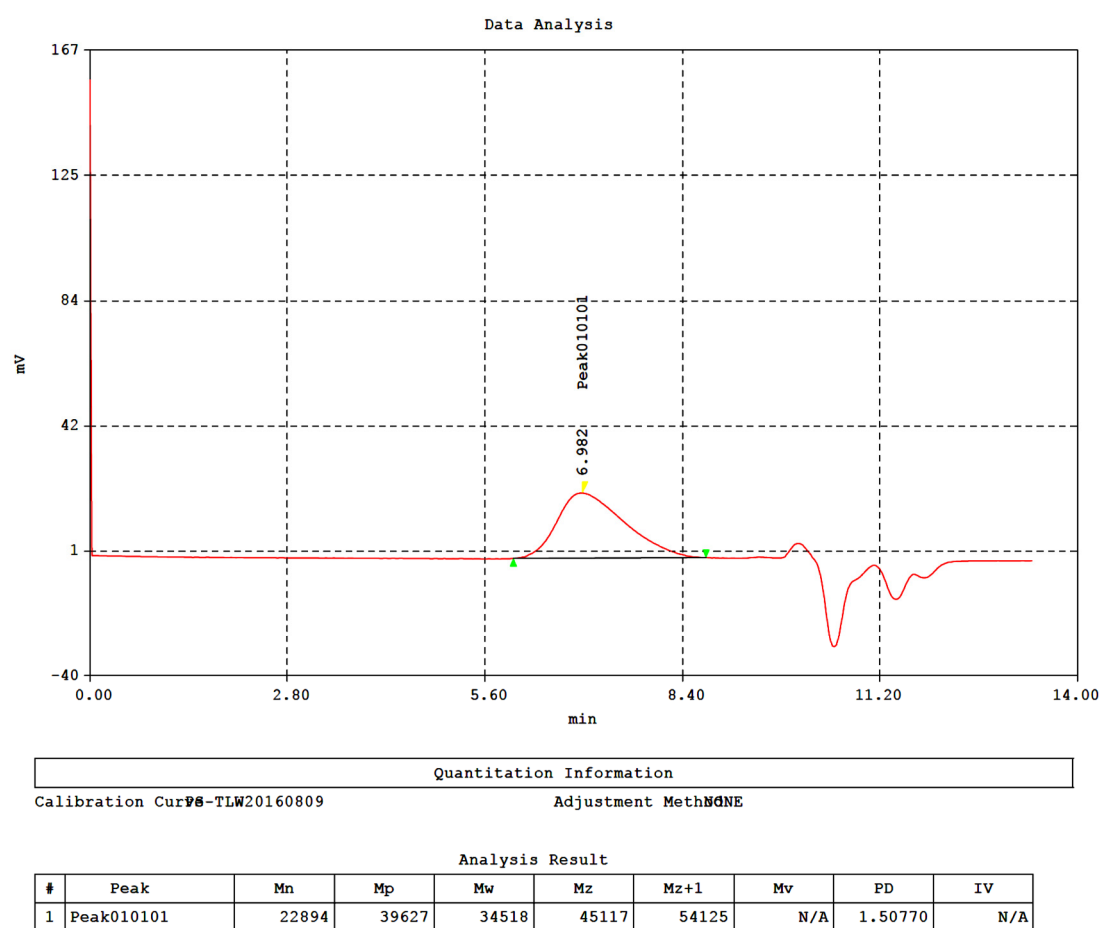

**Figure S1** Gel permeation chromatography (GPC) analyses on the synthesized poly(MAA-co-OD)

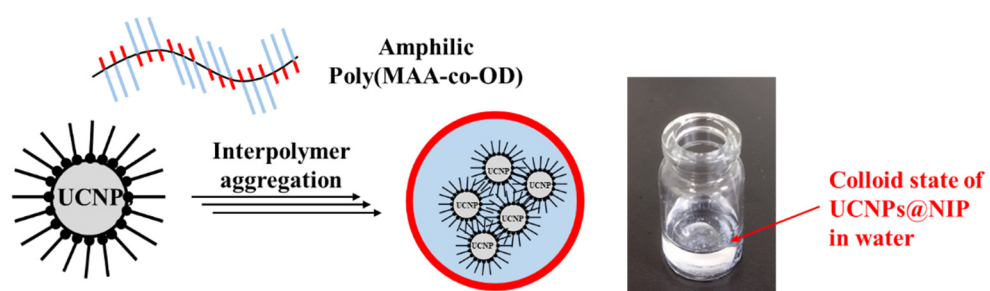

**Figure S2** Schematic representation of preparation of UCNP@NIP.
